# Supplementary material for: Novel α-1,3-Glucosyltransferase Variants and Their Broad Clinical Polycystic Liver Disease Spectrum
Source: MDPI journal article supplement (doi:10.3390/genes14081652), 2023-08-19
Supplement: s1 [file s1]

## Supplementary material

### MiniSeq preparation protocol

95 °C 3 minutes  
 95 °C 30 seconds  
 60 °C 30 seconds  
 72 °C 30 seconds  
 72 °C 5 minutes

} 40 cycles

### Primers for amplification of *ALG8* exons (NM\_024079.5)

| Exon & direction | Primer                                    |
|------------------|-------------------------------------------|
| 1-F              | GTAATCGGGAAGCTGAAGCGGCTTCAGAGGGCTTTCT     |
| 1-R              | GATCCGACGGTAGTGTATCCACACCTTTCTCTCCCG      |
| 2-F              | GTAATCGGGAAGCTGAAGCTGTGACAGCTTAGGGAATGT   |
| 2-R              | GATCCGACGGTAGTGTACCCAGCCAGAAAACATTT       |
| 3-F              | GTAATCGGGAAGCTGAAGTCGTTGCACCATCTTTGTTTATT |
| 3-R              | GATCCGACGGTAGTGTTCATACAAAATGACATGCTCCA    |
| 4-F              | GTAATCGGGAAGCTGAAGTCCGATGAAGATCAAAGTTGTTT |
| 4-R              | GATCCGACGGTAGTGTTCAGAAGGAGCTCACATCTC      |
| 5-F              | GTAATCGGGAAGCTGAAGGAGCAGTCCACATTAGTAGTAGT |
| 5-R              | GATCCGACGGTAGTGTACCCACTACACTGTTCCCTTT     |
| 6-F              | GTAATCGGGAAGCTGAAGAATGTCCTTGTTCTGTTCCAG   |
| 6-R              | GATCCGACGGTAGTGTACCAAGTCAACACAGTAAGGG     |
| 7-F              | GTAATCGGGAAGCTGAAGTGGTTAATGTTCTTTCCATCTT  |
| 7-R              | GATCCGACGGTAGTGTGGGGAGTCACGTTGGGTAA       |
| 8-F              | GTAATCGGGAAGCTGAAGACCATAGAGAGTTCCCTAGTTCT |
| 8-R              | GATCCGACGGTAGTGTTCATTTCTCCATGTGCCT        |
| 9-F              | GTAATCGGGAAGCTGAAGCCTTTAAGCAGCAATAAGATTT  |
| 9-R              | GATCCGACGGTAGTGTGAGCACCATCTGTTGAGTTC      |
| 10-F             | GTAATCGGGAAGCTGAAGTTCACCTGAACCTCTGTTTCTGT |
| 10-R             | GATCCGACGGTAGTGTCCAAAATGCTCACTGGCTGA      |
| 11-F             | GTAATCGGGAAGCTGAAGGCCTCAGCCAGTTCTAATGTAAT |
| 11-R             | GATCCGACGGTAGTGTATCTGTGGCCTCGATGAAA       |
| 12-F             | GTAATCGGGAAGCTGAAGCAGCATCATAAGTCTTTCTGTCA |
| 12-R             | GATCCGACGGTAGTGTGTGATTCTCCCTCTATTACCA     |
| 13a-F            | GTAATCGGGAAGCTGAAGTTGACTCTGGCCTTGGCTAT    |
| 13a-R            | GATCCGACGGTAGTGTCTGCACAATACTGAGGTTAGT     |
| 13b-F            | GTAATCGGGAAGCTGAAGTGGATGGAACTTTCTACCTGC   |
| 13b-R            | GATCCGACGGTAGTGTCCCATGAAATAATTGCTTGGC     |

F: Forward primer, R: Reverse primer

### Barcodes for MiniSeq preparation

| Number & direction | Primer                                                                |
|--------------------|-----------------------------------------------------------------------|
| 001-F              | AATGATACGGCGACCACCGAGATCTACACACCGGAACCTGATACGAGATCCGTAATCGGGAAGCTGAAG |

Novel ALG8 variants and their broad clinical polycystic liver disease spectrum  
Boerrigter et al. (2023)[43]

|       |                                                                                |
|-------|--------------------------------------------------------------------------------|
| 009-F | AATGATACGGCGACCACCGAGATCTACACA <u>AATCCG</u> TATGATACGAGATCCGTAATCGGGAAGCTGAAG |
| 017-F | AATGATACGGCGACCACCGAGATCTACAC <u>GAATAG</u> ATGATACGAGATCCGTAATCGGGAAGCTGAAG   |
| 097-F | AATGATACGGCGACCACCGAGATCTACAC <u>CCATG</u> ATTCGATACGAGATCCGTAATCGGGAAGCTGAAG  |
| 105-F | AATGATACGGCGACCACCGAGATCTACACA <u>GAATCCTC</u> GATACGAGATCCGTAATCGGGAAGCTGAAG  |
| 113-F | AATGATACGGCGACCACCGAGATCTACACT <u>GCGGCTT</u> GCGATACGAGATCCGTAATCGGGAAGCTGAAG |
| 193-F | AATGATACGGCGACCACCGAGATCTACAC <u>CTTGCA</u> GTAGATACGAGATCCGTAATCGGGAAGCTGAAG  |
| 201-F | AATGATACGGCGACCACCGAGATCTACAC <u>GACGGA</u> ATAGATACGAGATCCGTAATCGGGAAGCTGAAG  |
| 209-F | AATGATACGGCGACCACCGAGATCTACACT <u>TGGTTC</u> GAGATACGAGATCCGTAATCGGGAAGCTGAAG  |
| 289-F | AATGATACGGCGACCACCGAGATCTACAC <u>GTAACA</u> ATTCATACGAGATCCGTAATCGGGAAGCTGAAG  |
| 297-F | AATGATACGGCGACCACCGAGATCTACACT <u>ACTTCCG</u> TATACGAGATCCGTAATCGGGAAGCTGAAG   |
| 305-F | AATGATACGGCGACCACCGAGATCTACACT <u>TCGGAG</u> AGTCATACGAGATCCGTAATCGGGAAGCTGAAG |
| 385-F | AATGATACGGCGACCACCGAGATCTACAC <u>GTTATTG</u> GTATACGAGATCCGTAATCGGGAAGCTGAAG   |
| 393-F | AATGATACGGCGACCACCGAGATCTACAC <u>CCATTG</u> CGTTATACGAGATCCGTAATCGGGAAGCTGAAG  |
| 401-F | AATGATACGGCGACCACCGAGATCTACAC <u>GCCAAT</u> AGTTATACGAGATCCGTAATCGGGAAGCTGAAG  |
| 481-F | AATGATACGGCGACCACCGAGATCTACACT <u>CTCTCCG</u> GTATACGAGATCCGTAATCGGGAAGCTGAAG  |
| 489-F | AATGATACGGCGACCACCGAGATCTACACT <u>CCAGAAG</u> GTATACGAGATCCGTAATCGGGAAGCTGAAG  |
| 497-F | AATGATACGGCGACCACCGAGATCTACACT <u>GAGTTGC</u> GTATACGAGATCCGTAATCGGGAAGCTGAAG  |
| 577-F | AATGATACGGCGACCACCGAGATCTACAC <u>GATAGTC</u> GCTATACGAGATCCGTAATCGGGAAGCTGAAG  |
| 585-F | AATGATACGGCGACCACCGAGATCTACAC <u>GGAATG</u> AGCTATACGAGATCCGTAATCGGGAAGCTGAAG  |
| 593-F | AATGATACGGCGACCACCGAGATCTACAC <u>GTTGAG</u> TCCTATACGAGATCCGTAATCGGGAAGCTGAAG  |
| 673-F | AATGATACGGCGACCACCGAGATCTACACA <u>AATTGGC</u> GATATACGAGATCCGTAATCGGGAAGCTGAAG |
| 681-F | AATGATACGGCGACCACCGAGATCTACAC <u>CTAACT</u> AGATATACGAGATCCGTAATCGGGAAGCTGAAG  |
| 689-F | AATGATACGGCGACCACCGAGATCTACACT <u>AGCCGT</u> CATATACGAGATCCGTAATCGGGAAGCTGAAG  |
| 001-R | CAAGCAGAAGACGGCATAACGAGATGTTATTGGTTACACGCACGATCCGACGGTAGTGT                    |
| 009-R | CAAGCAGAAGACGGCATAACGAGAT <u>CCATTG</u> CGTTACACGCACGATCCGACGGTAGTGT           |
| 017-R | CAAGCAGAAGACGGCATAACGAGAT <u>GCCAAT</u> AGTTACACGCACGATCCGACGGTAGTGT           |
| 097-R | CAAGCAGAAGACGGCATAACGAGATTCTTCCGGTACACGCACGATCCGACGGTAGTGT                     |
| 105-R | CAAGCAGAAGACGGCATAACGAGATT <u>CCAGAAG</u> GTACACGCACGATCCGACGGTAGTGT           |
| 113-R | CAAGCAGAAGACGGCATAACGAGATTGAGTTGCGTACACGCACGATCCGACGGTAGTGT                    |
| 193-R | CAAGCAGAAGACGGCATAACGAGATGATAGTCGCTACACGCACGATCCGACGGTAGTGT                    |
| 201-R | CAAGCAGAAGACGGCATAACGAGATCGAATGAGCTACACGCACGATCCGACGGTAGTGT                    |
| 209-R | CAAGCAGAAGACGGCATAACGAGATGTTGAGTCCTACACGCACGATCCGACGGTAGTGT                    |
| 289-R | CAAGCAGAAGACGGCATAACGAGATAATTGGCGATACACGCACGATCCGACGGTAGTGT                    |
| 297-R | CAAGCAGAAGACGGCATAACGAGATCTAACTAGATACACGCACGATCCGACGGTAGTGT                    |
| 305-R | CAAGCAGAAGACGGCATAACGAGATTAGCCGTCTACACGCACGATCCGACGGTAGTGT                     |
| 385-R | CAAGCAGAAGACGGCATAACGAGATACGGAACCTGACACGCACGATCCGACGGTAGTGT                    |
| 393-R | CAAGCAGAAGACGGCATAACGAGATAATCCGTATGACACGCACGATCCGACGGTAGTGT                    |
| 401-R | CAAGCAGAAGACGGCATAACGAGATCGAATAGATGACACGCACGATCCGACGGTAGTGT                    |
| 481-R | CAAGCAGAAGACGGCATAACGAGATCCATGATTCGACACGCACGATCCGACGGTAGTGT                    |
| 489-R | CAAGCAGAAGACGGCATAACGAGATAGAATCCTCGACACGCACGATCCGACGGTAGTGT                    |
| 497-R | CAAGCAGAAGACGGCATAACGAGATTGGCGTTGCGACACGCACGATCCGACGGTAGTGT                    |
| 577-R | CAAGCAGAAGACGGCATAACGAGATCTTGCAGTAGACACGCACGATCCGACGGTAGTGT                    |
| 585-R | CAAGCAGAAGACGGCATAACGAGATGACGGAATAGACACGCACGATCCGACGGTAGTGT                    |
| 593-R | CAAGCAGAAGACGGCATAACGAGATTTGGTTCGAGACACGCACGATCCGACGGTAGTGT                    |
| 673-R | CAAGCAGAAGACGGCATAACGAGATGTACCAATTCACACGCACGATCCGACGGTAGTGT                    |
| 681-R | CAAGCAGAAGACGGCATAACGAGATTACTTCCGTACACGCACGATCCGACGGTAGTGT                     |
| 689-R | CAAGCAGAAGACGGCATAACGAGATTCCGAGAGTACACGCACGATCCGACGGTAGTGT                     |

F: Forward primer, R: Reverse primer

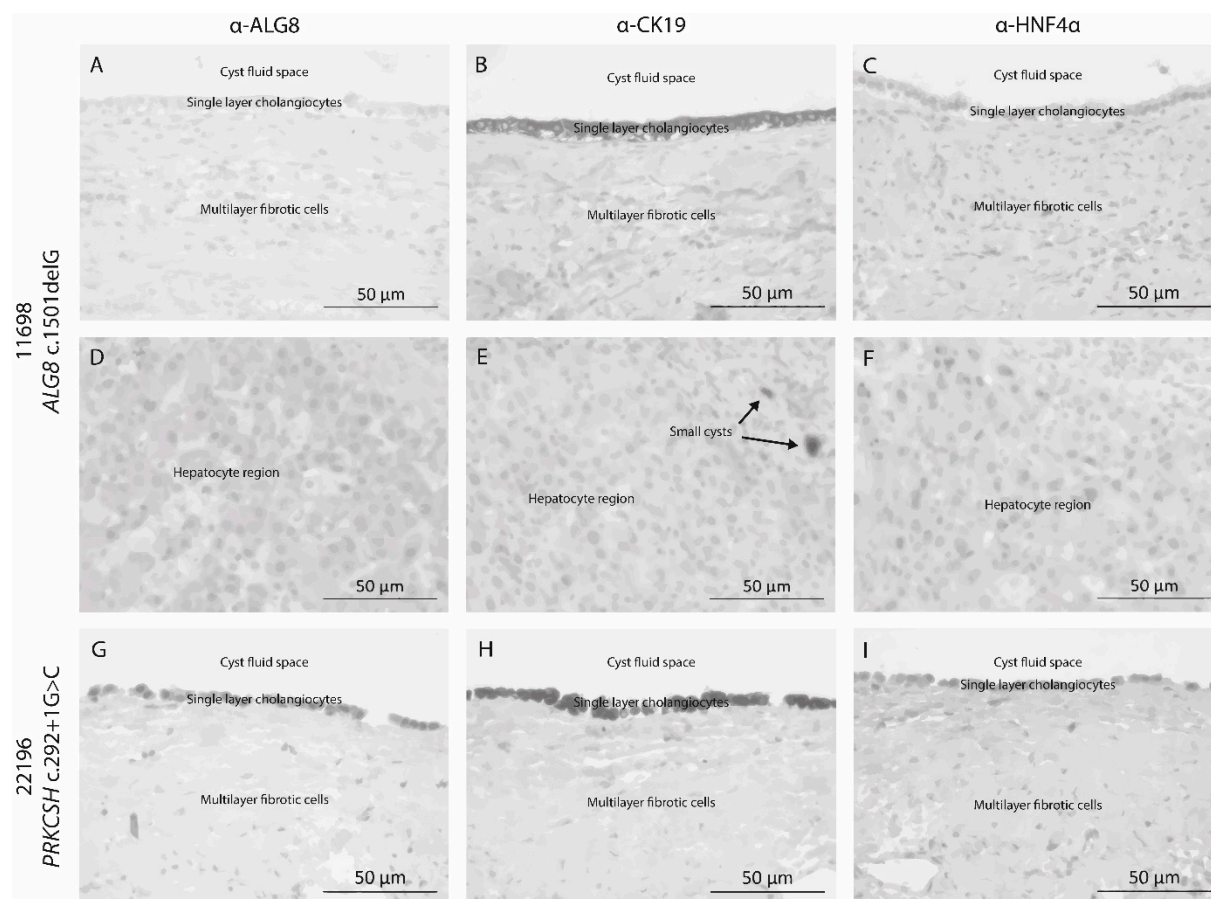

**Supplementary figure S1** Liver cyst key features. **A-C** and **G-I** Large cysts are encapsulated by a single layer of cholangiocytes followed by multiple layers of fibrotic/connective tissue. Lobules, portal veins, hepatic arteries, and hepatocytes are absent. **D-F** Hepatocytes remain in less severely affected regions. However, lobules, portal veins, and hepatic arteries are severely diminished. Small liver cysts start to arise (**E**).
